# Supplementary material for: Water assisted formation of a pseudorotaxane and its dimer based on a supramolecular cryptandElectronic supplementary information (ESI) available: Experimental details. See http://www.rsc.org/suppdata/cc/b3/b304995g/
Source: Royal Society of Chemistry journal article supplement (doi:10.1039/b304995g), 2003-01-01
Supplement: b304995g.doc [file b304995g.doc]

Water Assisted Formation of A Pseudorotaxane and Its Dimer Based on A Supramolecular Cryptand

Feihe Huang,*a* Lev N. Zakharov,*b* Arnold L. Rheingold,*b* Jason W. Jones*a* and Harry W. Gibson**a*

a Department of Chemistry, Virginia Polytechnic Institute and State University, Blacksburg, Virginia 24061-0212. Fax: 01 540 231 8517; Tel: 01 540 231 5902; E-mail: hwgibson@vt.edu

b Department of Chemistry and Biochemistry, University of Delaware, Newark, Delaware 19716‡

‡ Present address: Department of Chemistry and Biochemistry, University of California, San Diego, La Jolla, California, USA 92093.

**Supplemental Material (1 page)**

**General Experimental Procedures.** Compounds **1**, **2**, **3**-2PF6, were prepared as described in the literature (see text for references).

1H NMR data were collected on Varian Unity 400 MHz spectrometer at room temperature.

Association constants were estimated according to Eq. 1, where  represents the difference in  values (ppm) for any given proton observed upon mixing **1** or **2** (hereafter referred to as **host**) and **3**-2PF6(hereafter referred to as **guest**) versus **guest** in the absence of **host**, and where 0 represents the difference in  values between the chemical shift of the same given proton of **guest** in the absence of **host**versus the chemical shift of fully complexed **guest**, which may only be realized by overloading **guest** with **host**. [**Host**]uc and [**Guest**]uc represent concentrations of uncomplexed **host** and **guest**, respectively. For present purposes, we observed the chemical shift of H1 on **3**-2PF6to derive  while obtaining 0 by using the Benesi-Hildebrand method (see text for references).

(1)
